# 1 **Estimating Cuff-less Continuous Blood Pressure from** 2 **Fingertip Photoplethysmogram Signals with Deep Neural** 3 **Network Model**

4 Yu Chen<sup>a,\*</sup>

5 <sup>a</sup> *Beijing University of Chinese Medicine, Beijing 100029, China*

## 6 **Abstract**

7 **Objective:** Blood pressure (BP) is an important physiological index reflecting cardiovascular  
8 function. Continuous blood pressure monitoring helps to reduce the prevalence and mortality  
9 of cardiovascular diseases. In this study, we aim to estimate systolic blood pressure (SBP) and  
10 diastolic blood pressure (DBP) values continuously based on fingertip photoplethysmogram  
11 (PPG) waveforms using deep neural network models.

12 **Methods:** Two models were proposed and both models consisted of three stages. The only  
13 difference between them was the method of extracting features from PPG signals in the first  
14 stage. Model 1 adopted Bidirectional Long Short-Term Memory (BiLSTM), while the other  
15 used convolutional neural network. Then, the residual connection was applied to multiple  
16 stacked LSTM layers in the second stage, following by the third stage with two fully  
17 connected layers.

18 **Results:** Our proposed models outperformed other methods based on similar dataset or  
19 framework, while in our proposed models, the model 2 was superior to model 1. It satisfied  
20 the standard of Association for the Advancement of the Medical Instrumentation (AAMI) and  
21 obtained grade A for SBP and DBP estimation according to the British Hypertension Society  
22 (BHS) standard. The mean error (ME) and standard deviation (STD) for SBP and DBP  
23 estimations were  $0.21 \pm 6.40$  mmHg and  $0.19 \pm 4.71$  mmHg, respectively.

---

\* Corresponding author

NOTE: This preprint reports new research that has not been certified by peer review and should not be used to guide clinical practice.  
E-mail address: cy@bucm.edu.cn.

24 **Conclusion:** Our proposed models could extract important features of fingertip PPG  
25 waveforms automatically and realize cuff-less continuous BP monitoring, which can be  
26 helpful in the identification and early treatment of abnormal blood pressure, thus may reduce  
27 the occurrence of cardiovascular malignant events.

28 **Keywords:** Blood pressure (BP); Photoplethysmogram (PPG); Bidirectional Long  
29 Short-Term Memory (BiLSTM); Convolutional neural network (CNN); Continuous blood  
30 pressure monitoring (CBPM).

## 31 **1. Introduction**

32 Blood pressure (BP) is the pressure of blood acting on the walls of arteries[1], which  
33 fluctuates regularly with the contraction and relaxation of the heart. The maximum pressure  
34 corresponding to the contraction of the heart is called systolic blood pressure (SBP), and the  
35 minimum pressure corresponding to the diastole is called diastolic blood pressure (DBP), the  
36 normal and high-normal ranges of SBP and DBP in adults are <140 mmHg and <90 mmHg,  
37 respectively [2, 3]. High SBP is one of the main risk factors of cardiovascular diseases  
38 (CVDs), especially ischemic heart disease (IHD) and stroke, which are the leading cause of  
39 global mortality and disability[4]. With the acceleration of population aging, the prevalence  
40 of adults with high SBP nearly doubled from 2.18 billion in 1990 to 4.06 billion in 2019[4].  
41 From 1990 to 2019, the number of deaths due to high SBP increased from 6.79 million to  
42 10.8 million[4]. Therefore, BP monitoring is critical for the prevention and treatment of  
43 CVDs, alleviating the disease burden, and realizing the global health.

44 The existing methods of BP measurement can be divided into invasive measurement and  
45 non-invasive measurement. The invasive method usually places a catheter with a BP sensor  
46 directly in the blood vessel or heart for measurement. This method is the most accurate and  
47 considered as the gold standard of BP measurement internationally. However, it has the risk  
48 of bleeding and infection, which is only suitable for critically ill patients in hospitals and  
49 should be operated by professionals[5, 6]. Compared with invasive method, non-invasive  
50 measurement is more acceptable by people. Non-invasive BP measurement includes

51 intermittent blood pressure measurement (IBPM) and continuous blood pressure measurement  
52 (CBPM). The two traditional IBPM methods commonly used in clinical practice are the  
53 manual method based on Korotkoff sounds and the automatic method based on cuff pressure  
54 oscillation[7, 8]. Both methods are susceptible to external interference and require pressure on  
55 the cuff, which will cause discomfort to the human body. Besides, by the influence of genetic,  
56 environmental, and lifestyle factors, BP is dynamic[1]. For patients who need to monitor BP  
57 closely, in contrast to IBPM, CBPM can provide more detailed information of BP changes,  
58 which is of great significance in the diagnosis and analysis of diseases and medical research.  
59 The CBPM methods mainly include the volume-compensation, arterial tonometry, and pulse  
60 wave measurement[9]. The first two methods can also cause discomfort for its pressure on the  
61 blood vessels[10, 11]. In addition, the measurement process of the volume-compensation  
62 method is complex, and any state that causing low peripheral perfusion will affect the  
63 measurement results, such as cold temperature, vascular disease, and Raynaud's disease[9,  
64 10]. Moreover, the arterial tonometry method has a high requirement for sensor positioning,  
65 so it is rarely used in clinical practice[9, 11].

66 In recent years, pulse wave measurement has become one of the most promising  
67 methods for non-invasive cuff-less CBPM, especially the method based on  
68 photoplethysmogram (PPG)[6]. PPG is a non-invasive optical measurement technology for  
69 measuring peripheral pulse blood volume changes, which can be obtained from ear, finger,  
70 toe, and other sites[12]. It has been widely used in clinical physical monitoring, vascular  
71 assessment, and automatic function, with the characteristics of simple, reliable, and low  
72 cost[12]. The summary of the BP measurement methods is shown in figure 1.

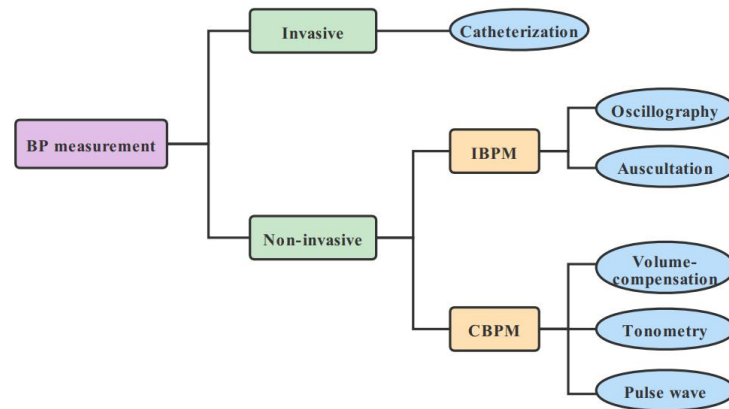

**Figure 1.** The block diagram of classification for BP measurement methods.  
BP = blood pressure, IBPM = intermittent blood pressure measurement, CBPM = continuous blood pressure measurement.

73

74 As a typical diagnosis and treatment method of traditional Chinese medicine (TCM), the  
75 pulse diagnosis has a history of more than two thousand years. It's one of the important  
76 means for TCM practitioners to obtain disease information[13]. TCM practitioners place their  
77 finger pulps on the skin of the human body where the pulsation is obvious, such as Renying  
78 (the carotid artery), Cunkou (the radial artery), and Fuyang (the dorsalis pedis artery) to  
79 obtain disease information[14, 15]. Considering the convenience of pulse-taking, Cunkou is  
80 usually chosen. However, the sensitivity of finger pulps is limited, it can only feel the pulse  
81 information from somewhere with obvious pulsation[15]. Besides, the pulse diagnosis relies  
82 on the subjective practical experience of the clinicians, which is difficult to be standardized  
83 and popularized in clinical practice. In recent years, with the rapid development of modern  
84 technology, many new methods for obtaining or analyzing pulse information have emerged,  
85 which bring new opportunities for the objective research of TCM[13]. For instance, the  
86 aforementioned PPG method can sensitively measure pulse information at many sites of the  
87 human body, other than Renying, Cunkou, and Fuyang.

88 The aim of this study is to explore the relationship between pulse and blood pressure  
89 based on fingertip PPG signals using neural network model, and to obtain continuous blood  
90 pressure information from the pulse wave. The establishment of the present method may also  
91 contribute our understanding of the relation between pulse and health in TCM theory. The  
92 present paper is organized as follows: Section 2 introduces the related methods and models of

93 BP estimation and describes the proposed method briefly. Section 3 give details about the  
94 data source and processing as well as the overall framework. Section 4 reports our  
95 experimental results. Section 5 discusses the results. Finally, section 6 concludes the paper.

## 96 2. Background

### 97 2.1 Morphological characteristics of PPG signal

98 PPG waveform consists of two parts: a pulsatile physiological waveform ('AC'  
99 component) and a slowly varying baseline ('DC' component). The rich information of heart  
100 pulsation mainly exists in the 'AC' component of the PPG waveform, which is mainly  
101 composed of the anacrotic phase and the catacrotic phase[12]. The rising border of the pulse  
102 corresponds to the anacrotic phase and the falling border represents the catacrotic phase  
103 (Figure 2). These two phases correspond to the systole and diastole of the heart respectively.  
104 During the relaxation of the heart, due to the wave reflections from the periphery, a dicrotic  
105 notch is formed in the catacrotic phase, which is commonly seen in healthy people[6, 12].

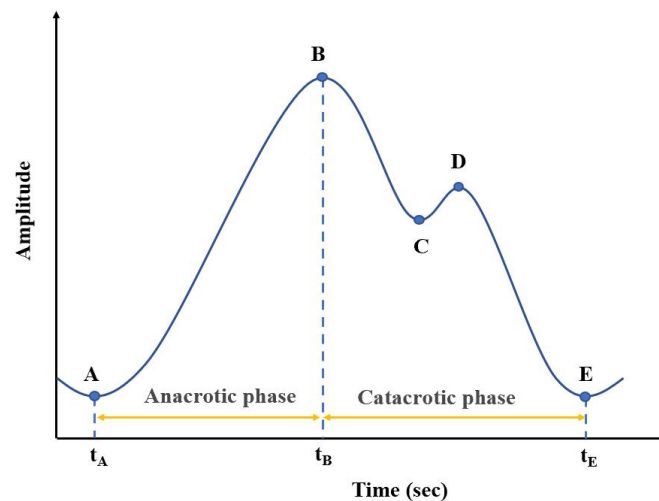

**Figure 2.** The sketch map of the 'AC' component of typical PPG waveform. A refers to the starting point of this wave, B is the main peak, C corresponds to the dicrotic notch, D represents the dicrotic wave, and E is the starting point of the next wave.

## 106 **2.2 BP estimation based on PPG**

107 The potential of PPG to measure BP has been recognized for decades[12]. In this  
108 section, we described several methods of BP measurement based on PPG signals.

### 109 **2.2.1 Pulse transit time methods**

110 Pulse transit time (PTT) is usually defined as the travel time between aortic valve  
111 opening and arrival of the blood flow to the distal position[2]. In many literatures, PTT is  
112 usually replaced by pulse arrival time (PAT) for its starting point is difficult to confirm[2, 16,  
113 17]. PAT refers to the time difference between the R-peak of an electrocardiogram (ECG) and  
114 a specific feature point of a PPG[18]. For example, Fung, et al. [19] have evaluated the BP  
115 value from the PTT (PAT actually), which can be described by Equation (1).

$$116 \quad BP = \frac{A}{PTT^2} + B \quad (1)$$

117 A and B are constants associated with subjects. This PTT-BP algorithm is simplistic, but it  
118 requires two sensors and complex calibration, which is hard to be applied in practice[19].

### 119 **2.2.2 Pulse wave velocity methods**

120 Pulse wave velocity (PWV) is the velocity of the pressure wave propagation in the blood  
121 vessels[5], which mainly depends on the elastic and geometric properties of the arterial  
122 wall[20]. The relationship of them can be illustrated using Moens-Kortweg equation[21, 22].  
123 Besides, PWV can be calculated by dividing the distance L between two sensors on the same  
124 arterial branch by the time difference T for the pressure wave propagating at this distance[23].  
125 Finally, the calculation of BP values from PWV can be described by Equation (2).

$$126 \quad PWV = \frac{L}{T} = \sqrt{\frac{hE_0e^{\alpha P}}{\rho d}} \quad (2)$$

127 where h is the thickness of the vessel wall,  $E_0$  represents the Young's modulus of elasticity for  
128 zero arterial pressure, e is Euler's number (approximately 2.718),  $\alpha$  is a vessel parameter  
129 (typically  $0.016 \text{ mmHg}^{-1}$  to  $0.018 \text{ mmHg}^{-1}$ ), P refers to BP,  $\rho$  represents blood density and d  
130 indicates the diameter of the vessel. Since parameters such as the arterial elasticity and the

131 length of the artery vary between individuals, it needs frequent calibration. Hence, it affects  
132 the application of PWV in health care[6].

### 133 **2.2.3 Pulse wave analysis methods**

134 Pulse wave analysis (PWA) refers to extract important features from the PPG waveform  
135 directly for creating models using machine learning or deep neural network[6, 24]. The most  
136 significant advantage of this method is that it only requires one PPG sensor for BP  
137 estimation[6]. Currently, there are two main methods for feature extraction. One is manual  
138 feature extraction, which is complex, error prone and uncompleted. For instance, Lin, et al.  
139 [25] have extracted 65 features from the PPG signals and their first and second derivative  
140 values for BP estimation and indicated that their proposed features set outperforms the two  
141 previously proposed feature sets[26, 27]. The other is automatic feature extraction based on  
142 specific algorithm[17]. Esmaelpoor, et al. [5] have adopted convolutional neural network  
143 (CNN) to extract the morphological features from PPG waveforms and then transmitted the  
144 extracted feature vector to the next stage for BP values evaluation. As the PPG signals can be  
145 affected by kinds of internal and external factors, extracting features manually become  
146 extraordinarily difficult[17]. Therefore, automatic feature extraction has more advantages for  
147 its simplicity and convenience.

## 148 **2.3 Machine learning models**

149 In recent years, many linear and non-linear models have been employed to estimate BP  
150 with PPG signals, such as linear regression[28, 29], support vector machine (SVM)[30],  
151 AdaBoost classifier[31], feedforward neural network[32], restricted boltzmann machine[33],  
152 and recurrent neural network (RNN)[34]. Generally, the performance of nonlinear model is  
153 better than that of linear model, but it also depends on the quality of dataset and the modelling  
154 method [6]. Currently, some advanced approaches have been proposed, such as Long-Short  
155 Term Memory (LSTM)[2, 17] and CNN models[5]. These models perform well in predicting  
156 BP values by using automatically extracted important features and have great potential in the  
157 future.

158 In this work, we proposed two hybrid neural network models to estimate cuff-less  
159 real-time BP values utilizing the features automatically extracted from fingertip PPG signals.  
160 The two hybrid models were similar in structure and mainly consisted of three stages. The  
161 first stage utilized CNN or Bidirectional Long Short-Term Memory (BiLSTM) to extract  
162 important features automatically from fingertip PPG signals, and the remaining stages used  
163 stacked LSTM layers with residual connection and two fully connected (FC) layers to  
164 estimate BP values based on the features extracted in the first stage.

## 165 **3. Materials and methods**

### 166 **3.1 Data source**

167 The dataset used in this paper was derived from [35], which belongs to the  
168 Multi-parameter Intelligent Monitoring in Intensive Care (MIMIC) II online waveform  
169 database of PhysioNet[36]. This database provides rich data including PPG (collected from  
170 pulse oximeter placed on the fingertip) as well as the arterial blood pressure (ABP, measured  
171 by a catheter in the radial artery) with sampling frequency of 125Hz. While the database  
172 provides a wealth of raw waveform signals, their quality is uneven, therefore, a powerful  
173 preprocessing method was taken by [35] for removing undesirable components such as  
174 baseline wander and low-quality signals to obtain reliable records. Thus, the preprocessed  
175 dataset was applied to evaluate the performance of our methods proposed in this work.

### 176 **3.2 Preprocessing**

#### 177 **3.2.1 Waveform segmentation and abnormal BP signals processing**

178 The waveforms of PPG and ABP always fluctuate periodically with the heartbeat,  
179 however, the fluctuation frequency is dynamic by the influence of internal and external  
180 factors. Therefore, the method of sliding segmentation with fixed number of cycles was  
181 adopted in this work rather than a fixed length. As shown in Figure 3, each segment consists  
182 of two cycles with the length of three consecutive PPG peaks, and then extracts the



183 corresponding ABP segments according to the peaks of PPG. It's worth noting that there is an  
184 overlap between adjacent segments with a length of one cycle.

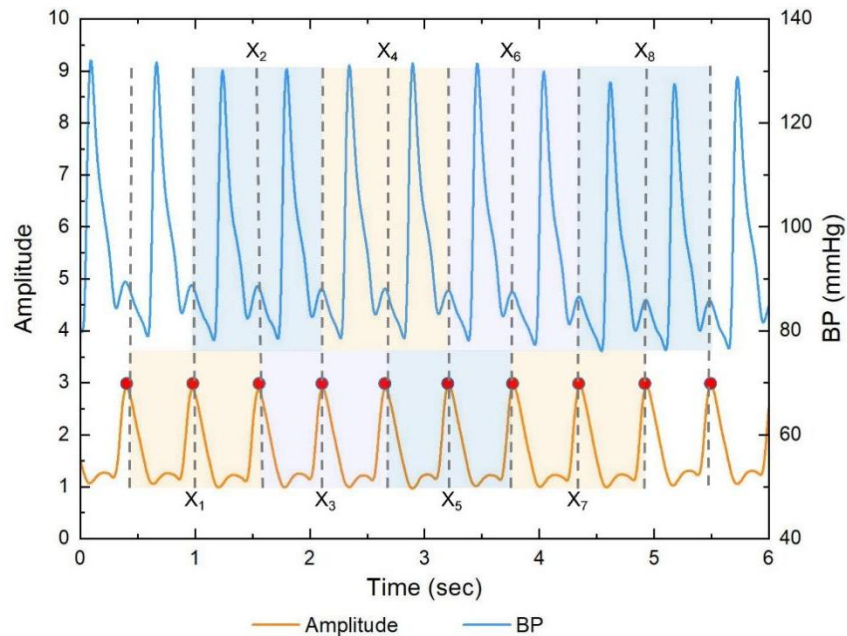

**Figure 3.** Illustration of waveform segmentation. The waveform of PPG is showed by orange, the ABP signal is performed by blue, and the peaks of PPG are marked with red dots. BP = blood pressure; ABP = arterial blood pressure; PPG = photoplethysmogram.

185 After removing the ABP segments with very high or very low BP values (e.g., SBP  $\geq$   
186 180, DBP  $\geq$  130, SBP  $\leq$  80, DBP  $\leq$  60) and the corresponding segments of PPG (SBP and  
187 DBP correspond to the maximum and minimum of each ABP segment respectively), we  
188 obtained millions of PPG segments and then resampled them to 256 samples. Finally, the first  
189 100,000 segments of the dataset were selected in this paper considering the training cost of  
190 models. Table 1 and figure 4 show the distribution and ranges of SBP, DBP, and mean arterial  
191 pressure (MAP) values in the final dataset.

192 **Table 1.** Statistics of the BP datasets used in the experiments.

|            | Min(mmHg) | Max(mmHg) | Mean(mmHg) | STD(mmHg) |
|------------|-----------|-----------|------------|-----------|
| <b>SBP</b> | 83.00     | 180.00    | 134.76     | 14.28     |
| <b>DBP</b> | 60.00     | 130.00    | 70.79      | 8.84      |
| <b>MAP</b> | 68.00     | 142.00    | 92.12      | 8.14      |

193

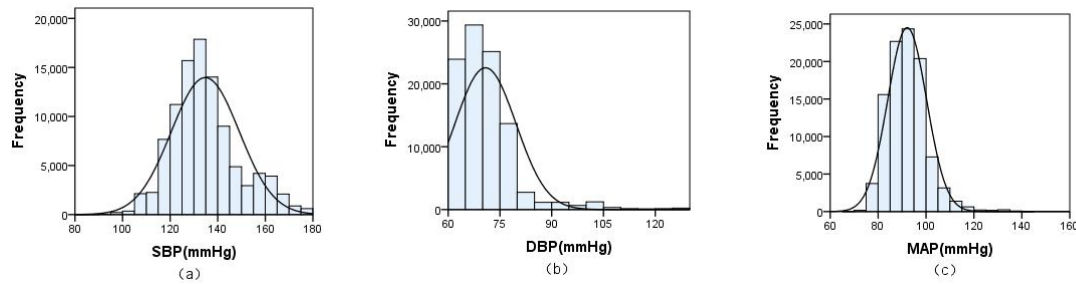

**Figure 4.** Distribution histogram of the dataset used in this paper. (a) systolic blood pressure (SBP), (b) diastolic blood pressure (DBP), (c) mean arterial pressure (MAP).

### 194 3.2.2 Normalization

195 In order to speed up the optimization process, we normalized the amplitude of PPG  
196 signals to [0-1]. The formula is as follows:

$$197 X_i' = \frac{X_i - X_{min}}{X_{max} - X_{min}} \quad (3)$$

198  $X_{max}$  and  $X_{min}$  are the maximum and minimum values of the training set respectively.

### 199 3.3 Multistage model

200 The overall flow diagram of the proposed methods is exhibited in figure 5. We fed the  
201 preprocessed data into two multistage deep learning models separately to test their  
202 performances in predicting BP, and the detailed frameworks are displayed in figure 6 and 7.  
203 Both models were composed of three stages. The only difference between them was in the  
204 first stage: model 1 adopted BiLSTM but model 2 adopted CNN to fully extract the important  
205 features of the whole input sequences. To solve the problem of vanishing or exploding  
206 gradient, we applied residual connections in multiple stacked LSTM layers in the next phase.  
207 Finally, the estimated SBP and DBP values were outputted after the last two fully connected  
208 (FC) layers.

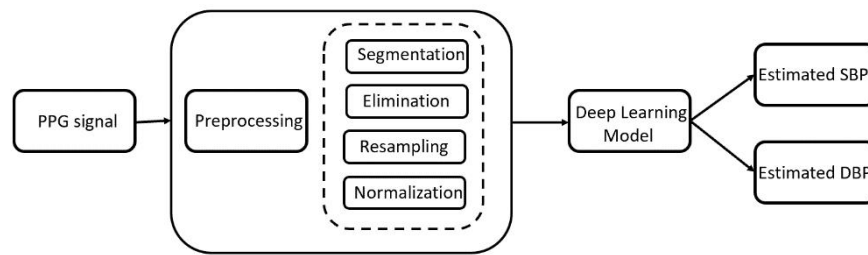

**Figure 5.** The flow diagram of proposed methods.

209 The first stage of model 1 was a BiLSTM, which processed sequences of inputs from the  
210 front and back directions[37]. It can improve the performance of predicting when processing  
211 time series compared with unidirectional LSTM[38, 39]. In addition, CNNs have also been  
212 widely used in BP estimation and achieved good results for its advantages in local perception  
213 and parameter sharing so as to simplify the complexity of the network model[40, 41]. CNNs  
214 have been commonly used for image processing, here we adopted it to process  
215 one-dimensional time series data which were arranged in an instant sequence of time[42]. As  
216 a note, both LSTM layers of BiLSTM consisted of 32 units, each vector  $X$  in model 1  
217 contained 16 features, and  $d$  represented the number of segments. In model 2, the CNN was  
218 composed of four hidden convolutional layers and the first two layers followed with an  
219 average pooling layer separately (please see Figure 7 for more details).

220 The second stage was composed of multiple stacked LSTM layers and each layer  
221 consisted of 64 units. Every two layers of LSTM were regarded as a whole, in which the  
222 residual connection was applied to the first layer. The sum of input and output vectors of  
223 previous layer was conducted as the input of next layer. In total, there were six structure cells  
224 like this (Figure 6).

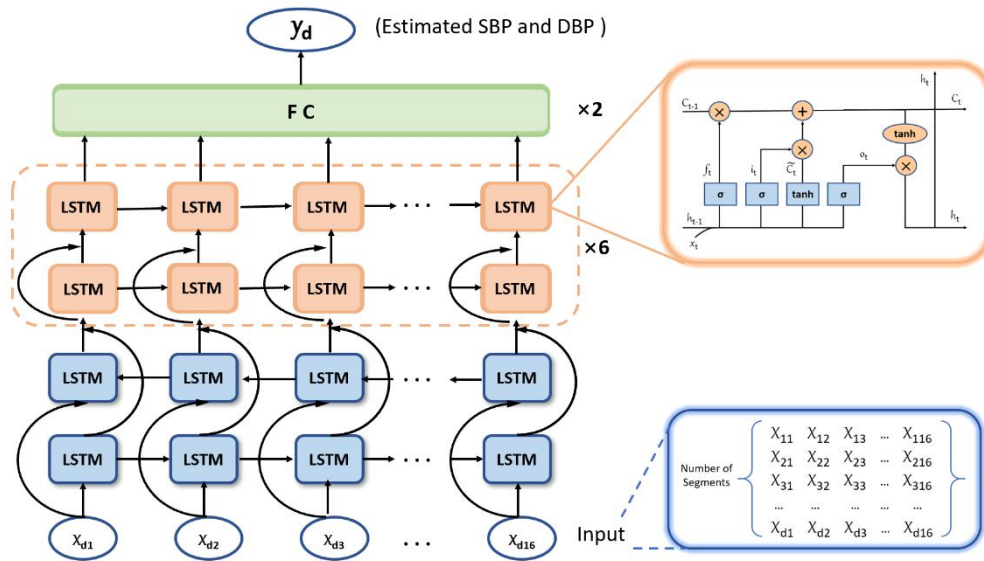

**Figure 6.** Overall framework of model 1 proposed in this paper. FC = fully connected layer, LSTM = Long-Short Term Memory.

225 In the final stage, the output from the last LSTM layer of the second stage was fed into  
 226 two FC layers to predict SBP and DBP values. The number of neurons in the first FC layer  
 227 was set to 512 and the second layer was 2.

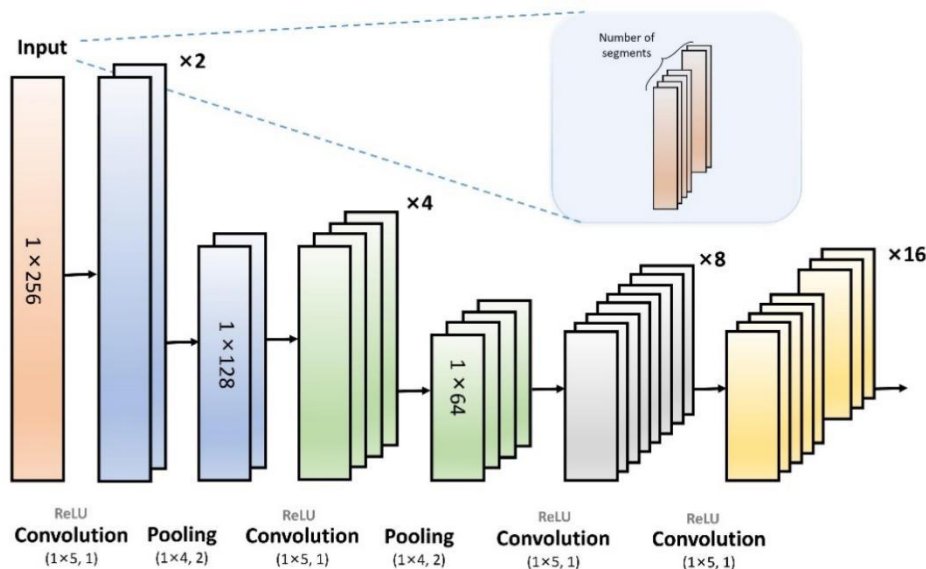

**Figure 7.** Illustration of the feature vectors extraction part in model 2.

228 Model parameters of the two models were identical. The activation function used in our  
 229 proposed models was ReLU, and the dropout rate was set to 0.2. In training process, we used  
 230 Adam Optimizer with the initial learning rate of 0.0001. In addition, the L2 norm of

231 regularization was set to 0.05, and the batch size was 32. For maximal epochs, 300 was used.  
232 We used mean square error (MSE) loss function to optimize gradient.

## 233 4. Results

234 In order to obtain a more stable and reliable model, we conducted the five-fold  
235 cross-validation on the dataset using the above two models respectively and the results were  
236 displayed in Table 2 and 3. Here, we used mean absolute error (MAE) and standard deviation  
237 (STD) as the evaluation metrics of the models. We found that the performances of both  
238 models were relatively stable. In general, both algorithms we proposed achieved relatively  
239 satisfactory results, while the performance of the model 2 based on CNN is slightly better  
240 than model 1 based on BiLSTM in stability and accuracy.

241 **Table 2.** Five-fold cross-validation results of Model 1 (BiLSTM).

|               | SBP         |             | DBP         |             |
|---------------|-------------|-------------|-------------|-------------|
|               | MAE         | STD         | MAE         | STD         |
| Fold 1        | 4.15        | 6.58        | 2.82        | 4.87        |
| Fold 2        | 4.18        | 6.46        | 2.76        | 4.74        |
| Fold 3        | 4.06        | 6.26        | 2.66        | 4.55        |
| Fold 4        | 4.14        | 6.57        | 2.81        | 4.74        |
| Fold 5        | 4.09        | 6.31        | 2.75        | 4.76        |
| Average (STD) | 4.12 (0.04) | 6.44 (0.13) | 2.76 (0.06) | 4.73 (0.10) |

242

243 **Table 3.** Five-fold cross-validation results of Model 2 (CNN-LSTM).

|               | SBP         |             | DBP         |             |
|---------------|-------------|-------------|-------------|-------------|
|               | MAE         | STD         | MAE         | STD         |
| Fold 1        | 3.89        | 6.31        | 2.60        | 4.68        |
| Fold 2        | 3.95        | 6.34        | 2.63        | 4.68        |
| Fold 3        | 3.98        | 6.29        | 2.64        | 4.59        |
| Fold 4        | 4.05        | 6.57        | 2.70        | 4.74        |
| Fold 5        | 4.06        | 6.48        | 2.70        | 4.85        |
| Average (STD) | 3.99 (0.06) | 6.40 (0.11) | 2.65 (0.04) | 4.71 (0.09) |

244 The comparison of our proposed models with other algorithms in BP estimation were  
 245 shown in Table 4. Notably, the estimation error (indicated by MAE and STD) of SBP and  
 246 DBP of our proposed models were smaller than that of other works. Besides, our proposed  
 247 models did not require manual feature extraction, which avoids the impact of manual  
 248 operation on the training process. Obviously, we found that the DBP estimation accuracy of  
 249 all models in Table 4 were higher than that of SBP, which may be caused by the large  
 250 fluctuation of SBP in human bodies. Therefore, the estimation error of SBP should be the  
 251 focus of evaluating the performance of models in predicting BP.

252 **Table 4.** Performance of different algorithms in blood pressure estimation.

| Methods            | Dataset  | Sensors | SBP(mmHg)    |              | DBP(mmHg)   |             |
|--------------------|----------|---------|--------------|--------------|-------------|-------------|
|                    |          |         | MAE          | STD          | MAE         | STD         |
| MARS[43]           | MIMIC II | PPG&ECG | 7.83         | 9.1          | 4.86        | 5.21        |
| AdaBoost[26]       | MIMIC II | PPG&ECG | <b>11.17</b> | 10.09        | <b>5.35</b> | 6.14        |
| BiLSTM-4L[2]       | MIMIC II | PPG&ECG | 6.73         | <b>14.51</b> | <b>2.52</b> | <b>6.44</b> |
| Model 1 (BiLSTM)   | MIMIC II | PPG     | 4.12         | 6.44         | 2.76        | 4.73        |
| Model 2 (CNN-LSTM) | MIMIC II | PPG     | <b>3.99</b>  | <b>6.40</b>  | 2.65        | <b>4.71</b> |

253 Note: the maximum and minimum values of MAE and STD were in bold.

254 We further assessed the performance of model 2, the best method we proposed, based on  
 255 Association for the Advancement of the Medical Instrumentation (AAMI) standard[44] and  
 256 British Hypertension Society (BHS) standard[45] (Table 5). According to the AAMI standard,  
 257 it requires the values of mean error (ME) and STD tested on more than 85 subjects lower than  
 258 5mmHg and 8mmHg separately. However, the BHS standard divides the performance of BP  
 259 measuring devices into three grades based on the cumulative frequency percentage of errors  
 260 (details were showed in Table 5). As a result, our proposed model 2 satisfied the AAMI  
 261 standard and obtained grade A for SBP and DBP estimation according to the BHS standard.

262 **Table 5.** Performance evaluation based on AAMI and BHS standards.

|         |         | Cumulative Error |         |         | ME     | STD    |
|---------|---------|------------------|---------|---------|--------|--------|
|         |         | ≤5mmHg           | ≤10mmHg | ≤15mmHg | (mmHg) | (mmHg) |
| BHS     | Grade A | 60%              | 85%     | 95%     | -      | -      |
|         | Grade B | 50%              | 75%     | 90%     | -      | -      |
|         | Grade C | 40%              | 65%     | 85%     | -      | -      |
| AAMI    |         | -                | -       | -       | <5     | <8     |
| Model 2 | SBP     | 77.60%           | 92.31%  | 96.17%  | 0.21   | 6.40   |

---

|     |        |        |        |      |      |
|-----|--------|--------|--------|------|------|
| DBP | 87.60% | 96.44% | 98.28% | 0.19 | 4.71 |
|-----|--------|--------|--------|------|------|

---

263 The distributions of SBP and DBP estimation error from the model 2 were presented in  
264 Figure 8. Both of the distributions were similar to the normal distribution and distributed  
265 around zero, while, the estimation errors for DBP have a lower variation compared with the  
266 SBP, indicating that the less variances in the target data, the smaller the prediction error.

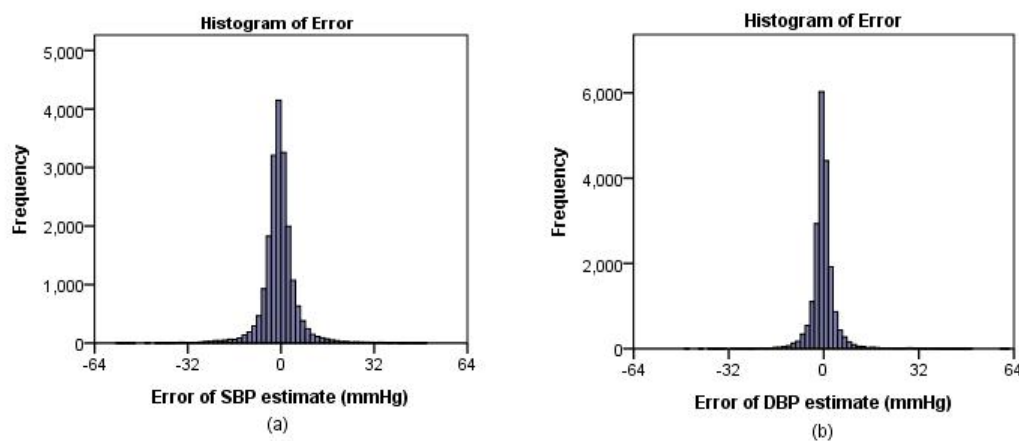

Figure 8. Error histogram from the model 2. (a) SBP, (b) DBP.

267 The spearman correlation coefficient between target and estimated values for SBPs and  
268 DBPs were 0.86 and 0.82 (Figure 9 a and b), respectively, indicating that there is a high  
269 correspondence between true and predicted BP. In addition, there was no significant  
270 difference in the distribution of the target and predicted values, although there were some  
271 outliers in the data (Figure 9 c and d). It means that our proposed model can also achieve  
272 satisfactory accuracy when predicting extreme BP values.

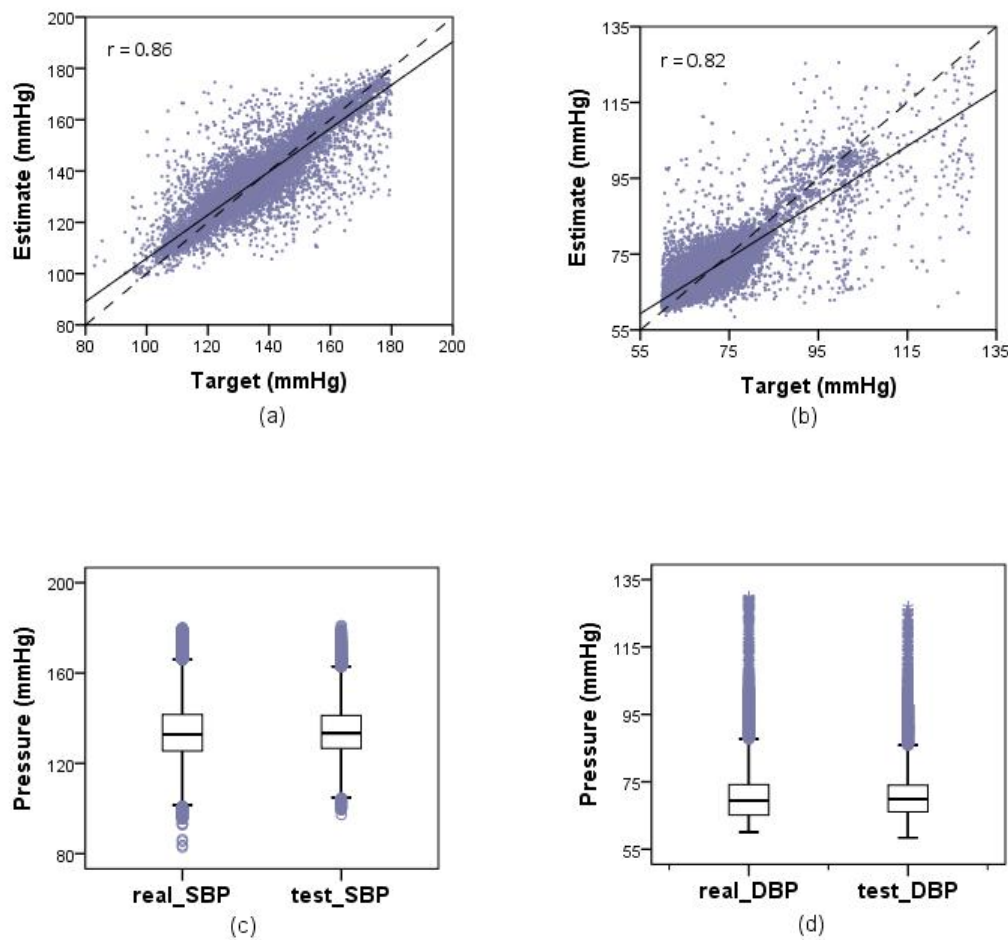

**Figure 9.** Regression plot and the box plot for SBP and DBP based on the estimation results from model 2. (a) and (b) represented the regression plot for SBP and DBP respectively, (c) and (d) represented the box plot for SBP and DBP respectively.

273 Moreover, we performed consistency evaluation using the Bland-Altman plots of SBP  
274 and DBP from model 2 (Figure 10). The area between two dashed lines represents that there  
275 is 95% of the difference between target and estimated values of SBP or DBP falling in  
276 [Mean - 1.96SD, Mean + 1.96SD], which is known as the 95% limits of agreement (95%  
277 LoA). Here, the 95% LoAs for SBP and DBP were [ - 12.76, 10.76] and [ - 9.80, 9.80],  
278 separately. As shown in figure 10, most of the errors fall within the ranges, thus, there is  
279 good consistency between the target and estimated values.



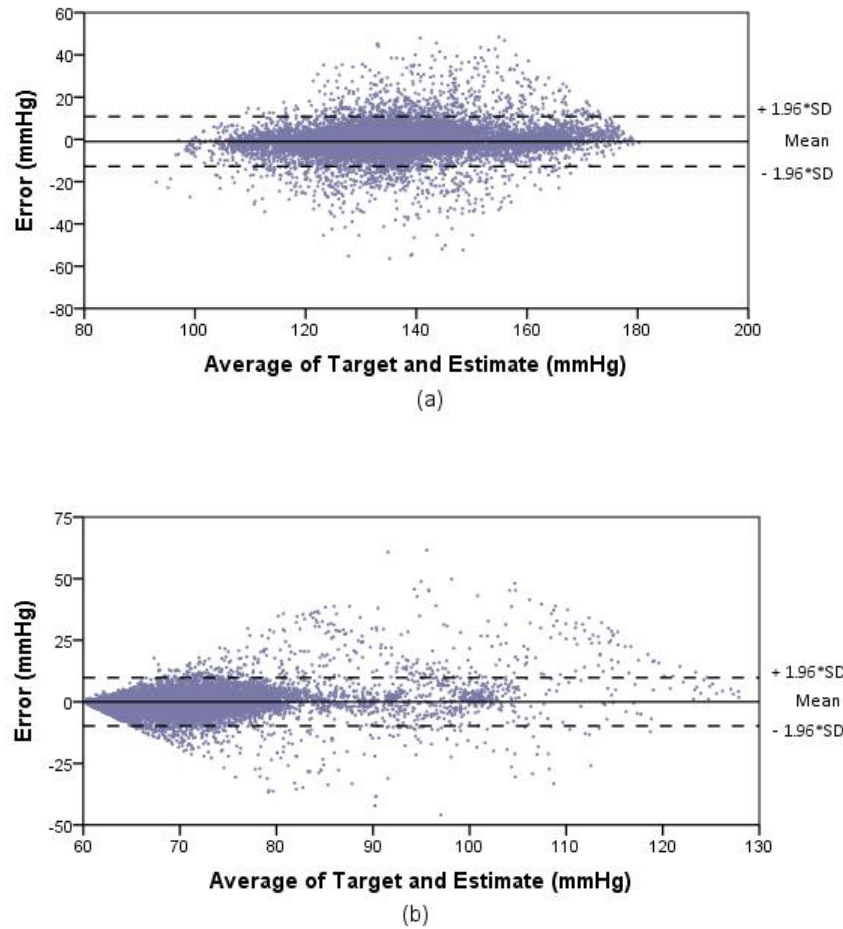

**Figure 10.** Bland-Altman plot of model 2. (a) SBP, (b) DBP.

## 280 **5. Discussion**

281 The subjects, quality of signals, data volume, and algorithms may influence the results of  
282 BP evaluation. In order to increase the comparability of the models, we chose to compare with  
283 other BP estimation methods based on datasets similar to ours in this paper and most of them  
284 came from the same batch of data initially, which became cleaner after rough  
285 preprocessing[35]. For instance, Sharifi, et al. [43] proposed a novel dynamical method by  
286 using PTT and PPG intensity ratio (PIR) coming from the preprocessed dataset for continuous  
287 BP estimation. Li, et al. [2] employed a deep learning model which had a similar framework  
288 with model 1 proposed in this work and adopted the same batch of data with our works, based  
289 on the ECG and PPG signals for BP estimation. Kachuee, et al. [26] presented a regression  
290 algorithm based on PAT and informative features from the vital signals in dataset MIMIC II

291 for the continuous and cuff-less BP estimation. Such comparison of the performance of  
292 different models in predicting BP values based on similar dataset is hard to see in previous  
293 similar studies. The result shows that the estimation error of the deep neural network models  
294 generally lower than the traditional machine learning methods. As for the reason why the  
295 STD of SBP in ‘BiLSTM-4L’[2] is so high, it may be caused by the huge variation of SBP in  
296 the database. It can be seen that the fluctuation range of SBP and DBP in the training dataset  
297 has great influence on the results.

298 In addition, we compared the model 1 with the algorithm of [2] to investigate the  
299 influence of different input signals on the performance of results with similar frameworks  
300 (Table 2). The outcome indicates that the performance of models based on the unique PPG  
301 signals can achieve a comparable and even better effect as the models based on the ECG and  
302 PPG signals, which suggests that the unique PPG signals are also promising for estimating the  
303 continuous BP values. Models based on the unique PPG signals can be more conveniently  
304 applied to daily monitoring of continuous BP values.

305 BiLSTM and CNNs are commonly used for automatic feature extraction in the latest  
306 studies. In order to compare the pros and cons of the two, we built two models based on them  
307 respectively, namely model 1 and model 2. Finally, we found that the result of BP estimation  
308 model based on CNNs performed better, indicating that CNNs might be slightly better than  
309 BiLSTM in extracting PPG features. The reason behind this, presumably, is that CNNs are  
310 good at learning the morphological features of signals from the spatial dimension, which  
311 helps to discover the local characteristics of signals and preserve more details[46]. Of course,  
312 it still needs more studies to verify.

313 However, there are also some limitations in our study. For example, our training samples  
314 were all from patients in the intensive care unit, hence, our algorithm had not been verified on  
315 other populations, so that lacking the evidences to evaluate the generalization ability of the  
316 models. Another important point is that the quality of the original signals in the MIMIC  
317 database was uneven, so the performance of the models depended heavily on the effect of

318 preprocessing. It may have better results if the stable and continuous high-quality signals can  
319 be obtained.

## 320 **6. Conclusion and future work**

321 In this paper, we proposed two multistage models based on deep neural network for  
322 estimating cuff-less continuous blood pressure using the unique PPG signals. Both models  
323 contained three parts, and the only difference between them was part one. The first part of  
324 model 1 adopted BiLSTM, while the model 2 adopted CNN. Although both of them had  
325 shown good prediction performance, the model based on CNN was slightly better. For the  
326 similar dataset, the performance of our proposed models were better than other models[2, 26,  
327 43] which required manual feature extraction. For the similar framework, the model 1 based  
328 on the unique PPG signals we proposed performed better than the model based on the ECG  
329 and PPG signals of [2]. Moreover, our proposed models had absolute advantages in automatic  
330 feature extraction, which is able to achieve the continuous BP measurement. As the best  
331 model we proposed, the model 2 satisfied the AAMI standard and obtained grade A for SBP  
332 and DBP estimation according to the BHS standard. What's more, it could be seen that the  
333 model had good fitting ability from the regression plots and the box plots for SBP and DBP.  
334 And the Bland-Altman plot showed that there were most errors fall within the 95% LoA,  
335 which indicated the good consistency between the target and estimated values. Nonetheless,  
336 all subjects of our proposed models came from the intensive care unit, the PPG signals of  
337 which were inferior in quality and lacks representativeness. Therefore, we must carry out  
338 complicated preprocessing in order to obtain high-quality PPG signals. In future works, we  
339 will try to improve the robustness and generalization of the model by training in larger  
340 number and wider variety of subjects with stable and high-quality PPG signals collected by  
341 more advanced equipments.

## 342 **Conflicts of Interest**

343 The author declares no conflict of interest.

## 344 **References**

- 345 [1] S. Padmanabhan and A. F. Dominiczak, "Genomics of hypertension: the road to  
346 precision medicine," *Nat Rev Cardiol*, vol. 18, no. 4, pp. 235-250, Apr 2021.
- 347 [2] Y. H. Li, L. N. Harfiya, K. Purwandari, and Y. D. Lin, "Real-Time Cuffless Continuous  
348 Blood Pressure Estimation Using Deep Learning Model," (in English), *Sensors (Basel,  
349 Switzerland)*, Article vol. 20, no. 19, 2020.
- 350 [3] T. Unger *et al.*, "2020 International Society of Hypertension Global Hypertension  
351 Practice Guidelines," *Hypertension*, vol. 75, no. 6, pp. 1334-1357, Jun 2020.
- 352 [4] G. A. Roth *et al.*, "Global Burden of Cardiovascular Diseases and Risk Factors,  
353 1990-2019: Update From the GBD 2019 Study," *J Am Coll Cardiol*, vol. 76, no. 25, pp.  
354 2982-3021, Dec 22 2020.
- 355 [5] J. Esmalpoor, M. H. Moradi, and A. Kadkhodamohammadi, "A multistage deep neural  
356 network model for blood pressure estimation using photoplethysmogram signals,"  
357 *Comput Biol Med*, vol. 120, p. 103719, May 2020.
- 358 [6] C. El-Hajj and P. A. Kyriacou, "A review of machine learning techniques in  
359 photoplethysmography for the non-invasive cuff-less measurement of blood pressure,"  
360 (in English), *Biomedical Signal Processing and Control*, Review vol. 58, 2020.
- 361 [7] G. Drzewiecki, R. Hood, and H. Apple, "Theory of the oscillometric maximum and the  
362 systolic and diastolic detection ratios," *Ann Biomed Eng*, vol. 22, no. 1, pp. 88-96,  
363 Jan-Feb 1994.
- 364 [8] D. Perloff *et al.*, "Human blood pressure determination by sphygmomanometry,"  
365 *Circulation*, vol. 88, no. 5 Pt 1, pp. 2460-70, Nov 1993.
- 366 [9] E. Chung, G. Chen, B. Alexander, and M. Cannesson, "Non-invasive continuous blood  
367 pressure monitoring: a review of current applications," *Frontiers of medicine*, vol. 7, no.  
368 1, pp. 91-101, 2013.
- 369 [10] J. Penaz, "Photoelectric measurement of blood pressure, volume and flow in the  
370 finger," in *Digest of the 10th Int. Conf. Med. Biol. Engineering, 1973*, 1973.
- 371 [11] G. Pressman and P. Newgard, "A transducer for the continuous external measurement  
372 of arterial blood pressure," *IEEE Transactions on Bio-medical Electronics*, vol. 10, no.  
373 2, pp. 73-81, 1963.
- 374 [12] J. Allen, "Photoplethysmography and its application in clinical physiological  
375 measurement," *Physiol Meas*, vol. 28, no. 3, pp. R1-39, Mar 2007.
- 376 [13] K. C. Lan, G. Litscher, and T. H. Hung, "Traditional Chinese Medicine Pulse Diagnosis  
377 on a Smartphone Using Skin Impedance at Acupoints: A Feasibility Study," *Sensors  
378 (Basel)*, vol. 20, no. 16, Aug 17 2020.
- 379 [14] J. W. Luo *et al.*, "Relationship between Renying pulse augmentation index and Cunkou  
380 pulse condition in different blood pressure groups," (in English), *J Tradit Chin Med*,  
381 vol. 34, no. 3, pp. 279-285, Jun 15 2014.
- 382 [15] Z. F. Fei, "Contemporary Pulse diagnosis of Traditional Chinese Medicine," *People's  
383 Health Publisher*, pp. 163-165, Jan 2006.
- 384 [16] J. Liu, B. P. Yan, W. X. Dai, X. R. Ding, Y. T. Zhang, and N. Zhao, "Multi-wavelength  
385 photoplethysmography method for skin arterial pulse extraction," *Biomed Opt Express*,  
386 vol. 7, no. 10, pp. 4313-4326, Oct 1 2016.

- 387 [17] M. S. Tanveer and M. K. Hasan, "Cuffless blood pressure estimation from  
388 electrocardiogram and photoplethysmogram using waveform based ANN-LSTM  
389 network," *Biomedical Signal Processing and Control*, vol. 51, pp. 382-392, 2019.
- 390 [18] Y. G. Lim *et al.*, "Monitoring physiological signals using nonintrusive sensors installed  
391 in daily life equipment," *Biomedical Engineering Letters*, vol. 1, no. 1, pp. 11-20, 2011.
- 392 [19] P. Fung, G. Dumont, C. Ries, C. Mott, and M. Ansermino, "Continuous noninvasive  
393 blood pressure measurement by pulse transit time," *Conf Proc IEEE Eng Med Biol Soc*,  
394 vol. 2006, pp. 738-41, 2004.
- 395 [20] F. N. van de Vosse and N. Stergiopoulos, "Pulse Wave Propagation in the Arterial Tree,"  
396 *Annual Review of Fluid Mechanics*, vol. 43, no. 1, pp. 467-499, 2011.
- 397 [21] D. Korteweg, "Ueber die Fortpflanzungsgeschwindigkeit des Schalles in elastischen  
398 Röhren," *Annalen der Physik*, vol. 241, no. 12, pp. 525-542, 1878.
- 399 [22] A. I. Moens, *Die Pulscurve*. Brill, 1878.
- 400 [23] H. Tjahjadi and K. Ramli, "Review of photoplethysmography based non-invasive  
401 continuous blood pressure methods," in *2017 15th International Conference on Quality  
402 in Research (QiR): International Symposium on Electrical and Computer Engineering*,  
403 2017: IEEE, pp. 173-178.
- 404 [24] M. Proença *et al.*, "Pulse wave analysis techniques," in *The Handbook of Cuffless  
405 Blood Pressure Monitoring*: Springer, 2019, pp. 107-137.
- 406 [25] W.-H. Lin, F. Chen, Y. Geng, N. Ji, P. Fang, and G. Li, "Towards accurate estimation of  
407 cuffless and continuous blood pressure using multi-order derivative and multivariate  
408 photoplethysmogram features," *Biomedical Signal Processing and Control*, vol. 63,  
409 2021.
- 410 [26] M. Kachuee, M. M. Kiani, H. Mohammadzade, and M. Shabany, "Cuffless Blood  
411 Pressure Estimation Algorithms for Continuous Health-Care Monitoring," *Ieee  
412 Transactions on Biomedical Engineering*, vol. 64, no. 4, pp. 859-869, Apr 2017.
- 413 [27] F. Miao *et al.*, "A novel continuous blood pressure estimation approach based on data  
414 mining techniques," *IEEE journal of biomedical and health informatics*, vol. 21, no. 6,  
415 pp. 1730-1740, 2017.
- 416 [28] M. K. B. A. Hassan, M. Mashor, N. M. Nasir, and S. Mohamed, "Measuring blood  
417 pressure using a photoplethysmography approach," in *4th Kuala Lumpur International  
418 Conference on Biomedical Engineering 2008*, 2008: Springer, pp. 591-594.
- 419 [29] X. Teng and Y. Zhang, "Continuous and noninvasive estimation of arterial blood  
420 pressure using a photoplethysmographic approach," in *Proceedings of the 25th Annual  
421 International Conference of the IEEE Engineering in Medicine and Biology Society  
422 (IEEE Cat. No. 03CH37439)*, 2003, vol. 4: IEEE, pp. 3153-3156.
- 423 [30] M. Liu, L.-M. Po, and H. Fu, "Cuffless blood pressure estimation based on  
424 photoplethysmography signal and its second derivative," *International Journal of  
425 Computer Theory and Engineering*, vol. 9, no. 3, p. 202, 2017.
- 426 [31] S. Suzuki and K. Oguri, "Cuffless blood pressure estimation by error-correcting output  
427 coding method based on an aggregation of adaboost with a photoplethysmograph  
428 sensor," in *2009 Annual international conference of the IEEE engineering in medicine  
429 and biology society*, 2009: IEEE, pp. 6765-6768.
- 430 [32] X. Xing and M. Sun, "Optical blood pressure estimation with photoplethysmography

- 431 and FFT-based neural networks," *Biomedical optics express*, vol. 7, no. 8, pp.  
432 3007-3020, 2016.
- 433 [33] V. R. Ripoll and A. Vellido, "Blood pressure assessment with differential pulse transit  
434 time and deep learning: a proof of concept," *Kidney Diseases*, vol. 5, no. 1, pp. 23-27,  
435 2019.
- 436 [34] C. Sideris, H. Kalantarian, E. Nemati, and M. Sarrafzadeh, "Building continuous  
437 arterial blood pressure prediction models using recurrent networks," in *2016 IEEE  
438 International Conference on Smart Computing (SMARTCOMP)*, 2016: IEEE, pp. 1-5.
- 439 [35] M. Kachuee, M. M. Kiani, H. Mohammadzade, and M. Shabany, "Cuff-less  
440 high-accuracy calibration-free blood pressure estimation using pulse transit time," in  
441 *2015 IEEE international symposium on circuits and systems (ISCAS)*, 2015: IEEE, pp.  
442 1006-1009.
- 443 [36] A. L. Goldberger *et al.*, "PhysioBank, PhysioToolkit, and PhysioNet: components of a  
444 new research resource for complex physiologic signals," *circulation*, vol. 101, no. 23,  
445 pp. e215-e220, 2000.
- 446 [37] A. Elsheikh, S. Yacout, and M.-S. Ouali, "Bidirectional handshaking LSTM for  
447 remaining useful life prediction," *Neurocomputing*, vol. 323, pp. 148-156, 2019.
- 448 [38] S. Siami-Namini, N. Tavakoli, and A. S. Namin, "The performance of LSTM and  
449 BiLSTM in forecasting time series," in *2019 IEEE International Conference on Big  
450 Data (Big Data)*, 2019: IEEE, pp. 3285-3292.
- 451 [39] J. Kim and N. Moon, "BiLSTM model based on multivariate time series data in  
452 multiple field for forecasting trading area," *Journal of Ambient Intelligence and  
453 Humanized Computing*, pp. 1-10, 2019.
- 454 [40] S. Shimazaki, H. Kawanaka, H. Ishikawa, K. Inoue, and K. Oguri, "Cuffless blood  
455 pressure estimation from only the waveform of photoplethysmography using CNN," in  
456 *2019 41st Annual International Conference of the IEEE Engineering in Medicine and  
457 Biology Society (EMBC)*, 2019: IEEE, pp. 5042-5045.
- 458 [41] J. Esmalpoor, M. H. Moradi, and A. Kadkhodamohammadi, "A multistage deep neural  
459 network model for blood pressure estimation using photoplethysmogram signals,"  
460 *Computers in Biology and Medicine*, vol. 120, p. 103719, 2020.
- 461 [42] G. Swapna, S. Kp, and R. Vinayakumar, "Automated detection of diabetes using CNN  
462 and CNN-LSTM network and heart rate signals," *Procedia computer science*, vol. 132,  
463 pp. 1253-1262, 2018.
- 464 [43] I. Sharifi, S. Goudarzi, and M. B. Khodabakhshi, "A novel dynamical approach in  
465 continuous cuffless blood pressure estimation based on ECG and PPG signals," (in  
466 English), *Artificial Intelligence in Medicine*, Article vol. 97, pp. 143-151, 2019.
- 467 [44] A. f. t. A. o. M. Instrumentation, "American National Standard Manual, Electronic or  
468 Automated Sphygmonanometers," 2003.
- 469 [45] E. O'Brien *et al.*, "The British Hypertension Society protocol for the evaluation of  
470 automated and semi-automated blood pressure measuring devices with special  
471 reference to ambulatory systems," *Journal of hypertension*, vol. 8, no. 7, pp. 607-619,  
472 1990.
- 473 [46] S. Baker, W. Xiang, and I. Atkinson, "A hybrid neural network for continuous and  
474 non-invasive estimation of blood pressure from raw electrocardiogram and

475 photoplethysmogram waveforms," *Computer Methods and Programs in Biomedicine*,  
476 vol. 207, p. 106191, 2021.  
477  
478  
479  
480  
481
